# Supplementary material
Source: PubMed Central journal article supplement (PMC9980560)
Supplement: Supplementary_Digital_Material1.pdf [file Supplementary_Digital_Material1.pdf]

SUPPLEMENTARY DIGITAL MATERIAL 1

Supplementary Table I.—Intervention table (excerpt from an ICF-based case study of a person with spinal cord injury).<sup>a</sup>

| ICF category/Intervention target |                                                 | Intervention                         | Doc | Nurse | PT | OT | First value | Goal value | Final value |
|----------------------------------|-------------------------------------------------|--------------------------------------|-----|-------|----|----|-------------|------------|-------------|
| b420                             | Blood pressure functions                        | Medication; Compression hosiery      | x   | x     |    |    | 1           | 0          | 0           |
|                                  |                                                 | Standing Table                       |     |       | x  |    |             |            |             |
| b455                             | Exercise tolerance functions                    | Endurance training with ergometer    |     |       | x  |    | 2           | 1          | 3           |
| b710                             | Mobility of joint functions                     | Passive movement                     |     |       | x  | x  | 0           | 0          | 0           |
| b730                             | Muscle power functions (isolated muscle groups) | Muscle power training with equipment |     |       | x  |    | 2           | 1          | 1           |
| b735                             | Muscles tone functions                          | Medication                           | x   |       |    |    | 3           | 1          | 1           |
|                                  |                                                 | Hippotherapy                         |     |       | x  |    |             |            |             |
| b7603                            | Supportive functions of arms                    | Prop-up training; Equipment training |     |       | x  |    | 2           | 1          | 1           |
| d410                             | Changing basic body positions                   | Repetitive training                  |     |       | x  | x  | 3           | 1          | 2           |
| d415                             | Maintaining a body position (sitting)           | Table tennis, Hippotherapy           |     |       | x  |    | 2           | 1          | 1           |
| d420                             | Transferring oneself (while sitting)            | Repetitive transfer training         |     | x     | x  | x  | 2           | 1          | 1           |
| d510                             | Washing oneself                                 | Support                              |     | x     |    |    | 3           | 2          | 2           |
| d520                             | Caring for body parts (skin)                    | Support; instructions                |     | x     |    |    | 4           | 3          | 4           |
| d530                             | Toileting                                       | Support                              |     | x     |    |    | 4           | 3          | 4           |
| d540                             | Dressing                                        | Support; instructions                |     | x     |    |    | 3           | 2          | 3           |

Adding a short and simple description for each ICF category, such as those already available for the ICF Generic-30 Set categories, <sup>b</sup> would facilitate the practical implementation of the ICF-based documentation forms within the IRP. The template for the Intervention Table and the other documentation forms are available on the downloads section at [www.icf-research-branch.org](http://www.icf-research-branch.org).

Doc: Physician; PT: Physical Therapist; OT: Occupational Therapist. First value: Rating (0=no problem, 1=mild problem, 2=moderate problem, 3=severe problem, 4=complete problem) of the patient's problems in the respective ICF category at the initial assessment; Goal value: Rating that should be achieved after intervention; Final value: Rating at the second assessment or evaluation.

### **References**

<sup>a</sup>Swiss Paraplegic Research. Translating interventions into real-life gains - A Rehab-Cycle Approach. [Internet; Accessed February 2021].

Available from: [www.icf-casestudies.org](http://www.icf-casestudies.org).

<sup>b</sup>Selb M, Gimigliano F, Prodinger B, Stucki G, Pestelli G, Iocco M, Boldrini P. Toward an International Classification of Functioning, Disability and Health clinical data collection tool: the Italian experience of developing simple, intuitive descriptions of the Rehabilitation Set categories. *Eur J Phys Rehabil Med.* 2017; 53(2):290-298.

Supplementary Table II.—Evaluation display: includes the categorical profile (excerpt from an ICF-based case study of a person with spinal cord injury).

|                                                    |                                                 | INITIAL ASSESSMENT<br>Extent of Problem<br>from 0 (no problem)<br>to 4 (complete problem) |   |   |   |   | Goal value    | FINAL ASSESSMENT<br>Extent of Problem<br>from 0 (no problem)<br>to 4 (complete problem) |                                                                                      |   |   |   | Goal Achievement |                  |
|----------------------------------------------------|-------------------------------------------------|-------------------------------------------------------------------------------------------|---|---|---|---|---------------|-----------------------------------------------------------------------------------------|--------------------------------------------------------------------------------------|---|---|---|------------------|------------------|
|                                                    |                                                 | 0                                                                                         | 1 | 2 | 3 | 4 |               | 0                                                                                       | 1                                                                                    | 2 | 3 | 4 |                  |                  |
| Global Goal: Community integration                 |                                                 |                                                                                           |   |   |   |   | 1             | <i>Not yet evaluated</i>                                                                |                                                                                      |   |   |   |                  |                  |
| Service-Program Goal: Independence in daily living |                                                 |                                                                                           |   |   |   |   | 1             |                                                                                         |                                                                                      |   |   |   | +                |                  |
| Cycle goal 1: Independence in mobility             |                                                 |                                                                                           |   |   |   |   | 1             |                                                                                         |                                                                                      |   |   |   | +                |                  |
| Cycle goal 2: Improvement in self-care             |                                                 |                                                                                           |   |   |   |   | 2             |                                                                                         |                                                                                      |   |   |   | -                |                  |
| ICF category                                       |                                                 | Extent of Problem<br>(First value)<br>from 0 (no problem)<br>to 4 (complete problem)      |   |   |   |   | Goal Relation | Goal value                                                                              | Extent of Problem<br>(Final value)<br>from 0 (no problem)<br>to 4 (complete problem) |   |   |   |                  | Goal Achievement |
|                                                    |                                                 | 0                                                                                         | 1 | 2 | 3 | 4 |               |                                                                                         | 0                                                                                    | 1 | 2 | 3 | 4                |                  |
| b420                                               | Blood pressure functions                        |                                                                                           |   |   |   |   | 1             | 0                                                                                       |                                                                                      |   |   |   |                  | +                |
| b455                                               | Exercise tolerance functions                    |                                                                                           |   |   |   |   | 1             | 1                                                                                       |                                                                                      |   |   |   |                  | -                |
| b710                                               | Mobility of joint functions                     |                                                                                           |   |   |   |   | 1             | 0                                                                                       |                                                                                      |   |   |   |                  | +                |
| b730                                               | Muscle power functions (isolated muscle groups) |                                                                                           |   |   |   |   | 1             | 1                                                                                       |                                                                                      |   |   |   |                  | +                |
| b735                                               | Muscles tone functions                          |                                                                                           |   |   |   |   | 1             | 1                                                                                       |                                                                                      |   |   |   |                  | +                |

|       |                                       |  |   |   |  |   |
|-------|---------------------------------------|--|---|---|--|---|
| b7603 | Supportive functions of arms          |  | 1 | 1 |  | + |
| d410  | Changing basic body positions         |  | 1 | 1 |  | - |
| d415  | Maintaining a body position (sitting) |  | 1 | 1 |  | + |
| d420  | Transferring oneself (while sitting)  |  | 1 | 1 |  | + |
| d510  | Washing oneself                       |  | 2 | 2 |  | + |
| d520  | Caring for body parts (skin)          |  | 2 | 3 |  | - |
| d530  | Toileting                             |  | 2 | 3 |  | - |
| d540  | Dressing                              |  | 2 | 2 |  | - |

<sup>a</sup>Adding a short and simple description for each ICF category, such as those already available for the ICF Generic-30 Set categories, <sup>b</sup>would facilitate the practical implementation of the ICF-based documentation forms within the IRP. The template for the Evaluation Display and the other documentation forms are available on the downloads section at [www.icf-research-branch.org](http://www.icf-research-branch.org).

Global Goal: long-term goal that the patient and rehabilitation team would like to reach at the end of rehabilitation; Service-Program Goal:

Overarching goal to be reach at the end of the particular Rehab-Cycle; Cycle Goal: one or more short-term goals to achieve during the Rehab-Cycle;

Goal relation: 1 and 2 refer to cycle goals 1 and 2 respectively; Goal value: Rating that should be achieved after intervention; Final value: Rating at the second assessment or evaluation; Goal achievement: + means achieved, - means not achieved. Rating scale: 0 = no problem, 1=mild problem, 2=moderate problem, 3=severe problem, 4 = complete problem.

### References

<sup>a</sup>Swiss Paraplegic Research. Translating interventions into real-life gains - A Rehab-Cycle Approach. [Internet; Accessed February 2021].

Available from: [www.icf-casestudies.org](http://www.icf-casestudies.org).

<sup>b</sup>Selb M, Gimigliano F, Prodinger B, Stucki G, Pestelli G, Iocco M, Boldrini P. Toward an International Classification of Functioning, Disability and Health clinical data collection tool: the Italian experience of developing simple, intuitive descriptions of the Rehabilitation Set categories. Eur J Phys Rehabil Med. 2017; 53(2):290-298.
